# Supplementary material
Source: PubMed Central journal article supplement (PMC3786168)

Supplemental Figure 1

A

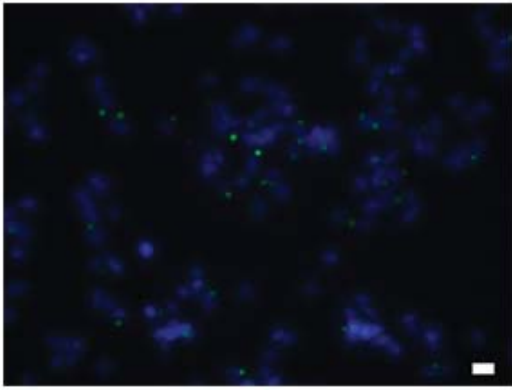

0  $\mu$ M EGCG

B

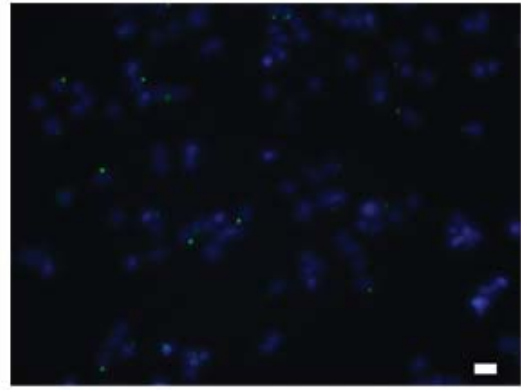

0.01  $\mu$ M EGCG

C

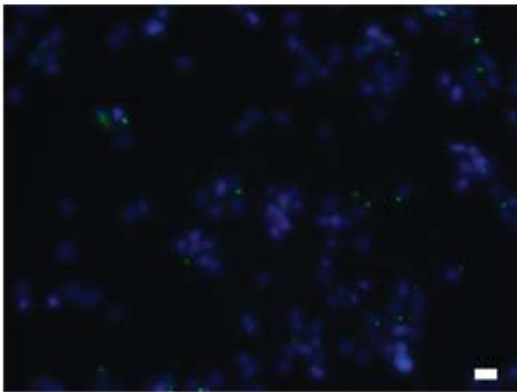

0.1  $\mu$ M EGCG

D

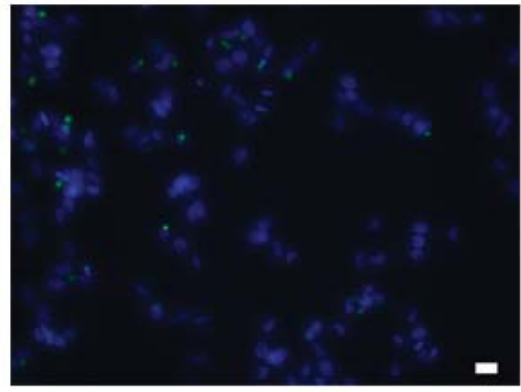

1  $\mu$ M EGCG

E

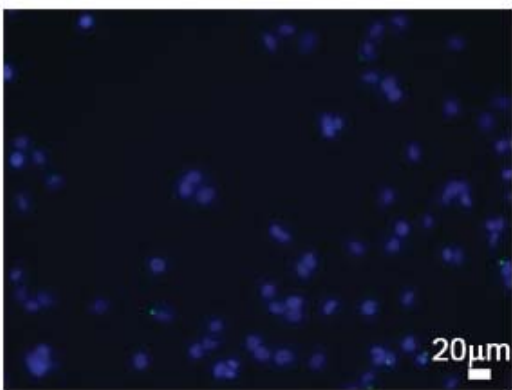

10  $\mu$ M EGCG

Supplemental Figure 3

A

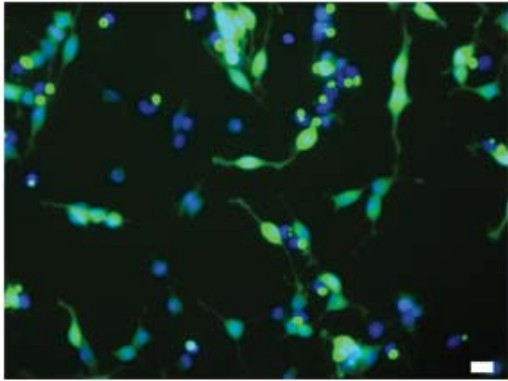

0 nM CEP-1347

B

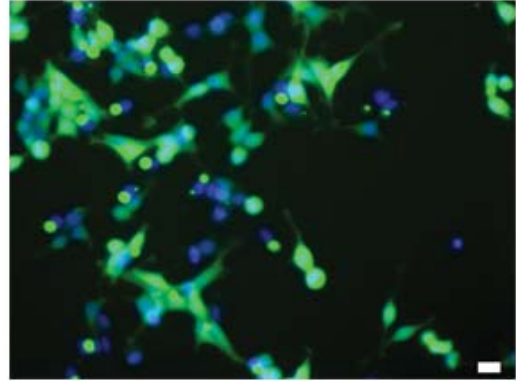

100 nM CEP-1347

C

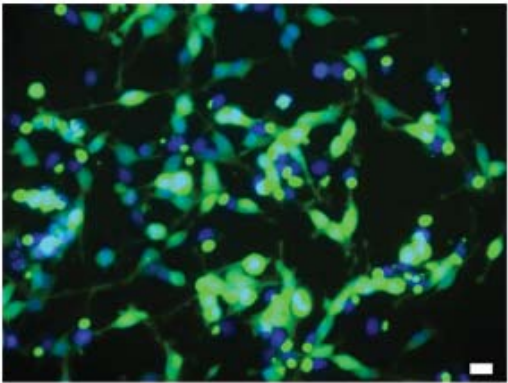

200 nM CEP-1347

D

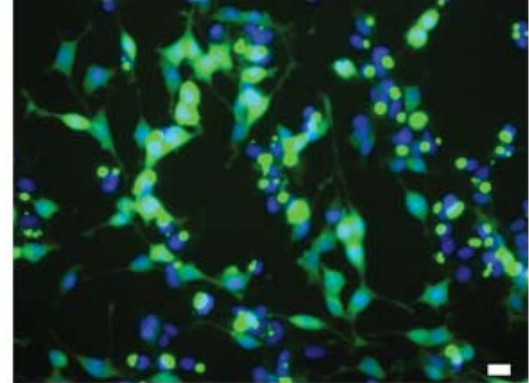

500 nM CEP-1347

E

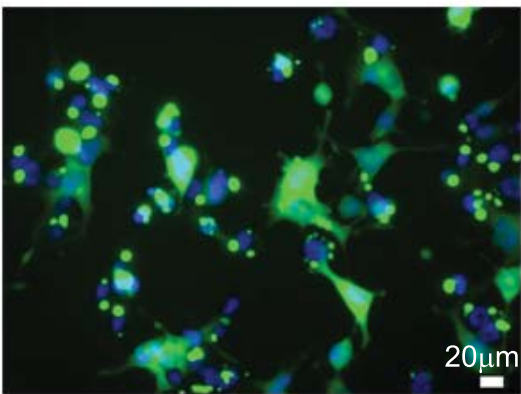

1000 nM CEP-1347

Supplemental figure 5

A

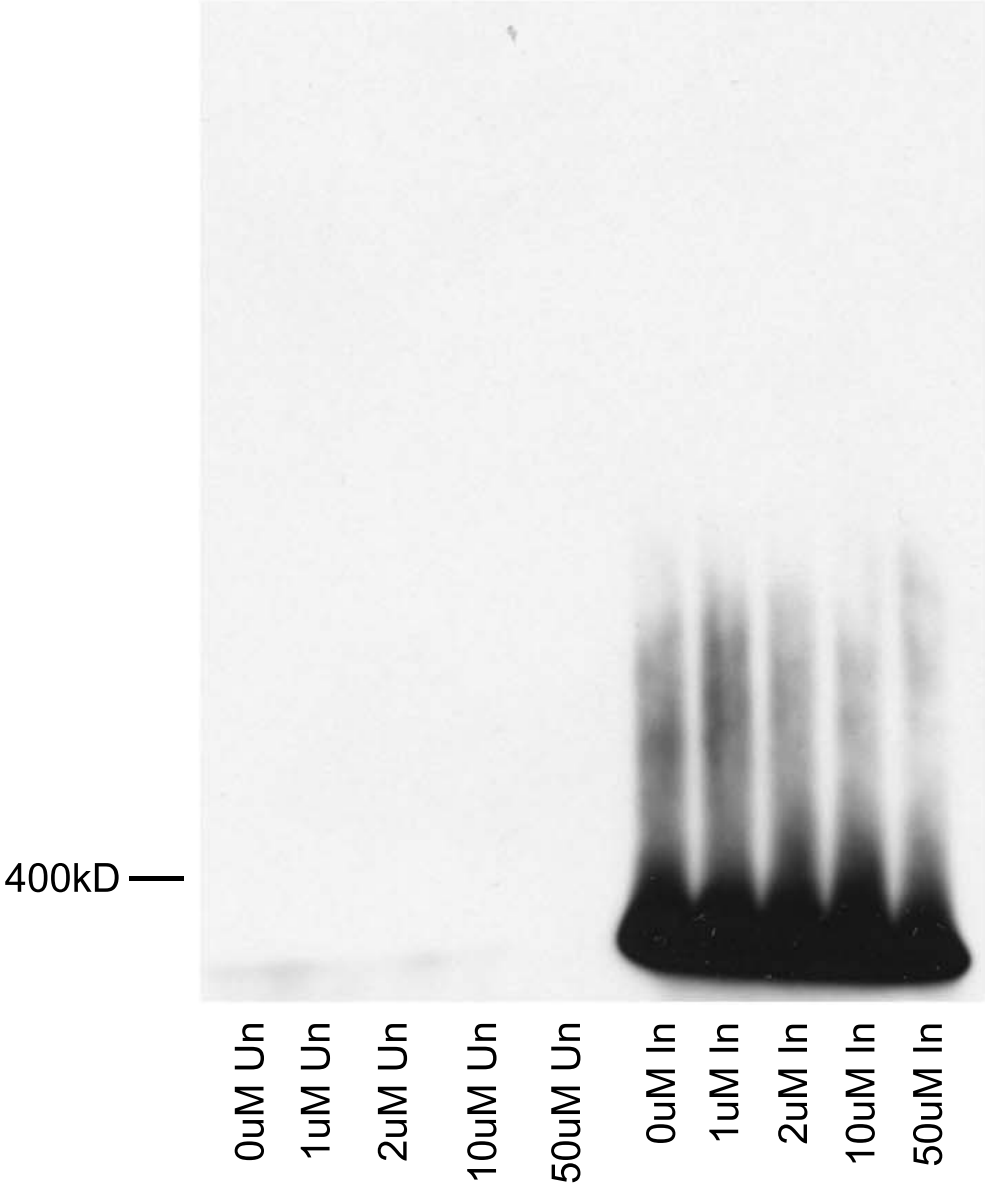

B

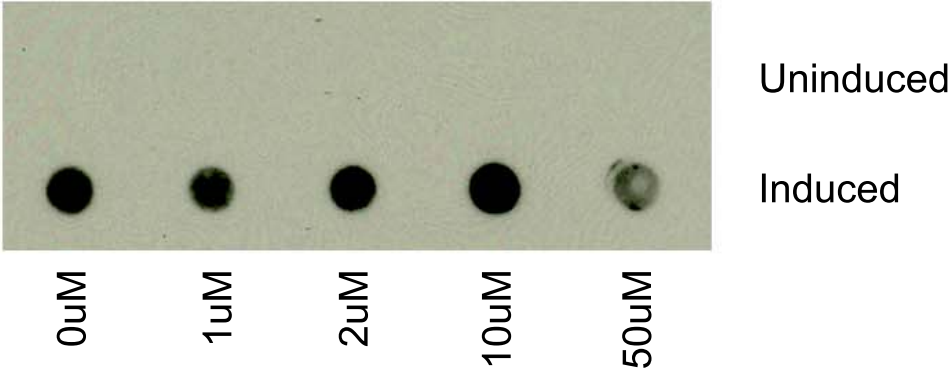

Supplement: NIHMS422273-supplement-Supplemental_figures.pdf [file NIHMS422273-supplement-Supplemental_figures.pdf]
